# Supplementary material for: Do longer sequences improve the accuracy of identification of forensically important Calliphoridae species?
Source: PeerJ journal article supplement (doi:10.7717/peerj.5962), 2018-12-17

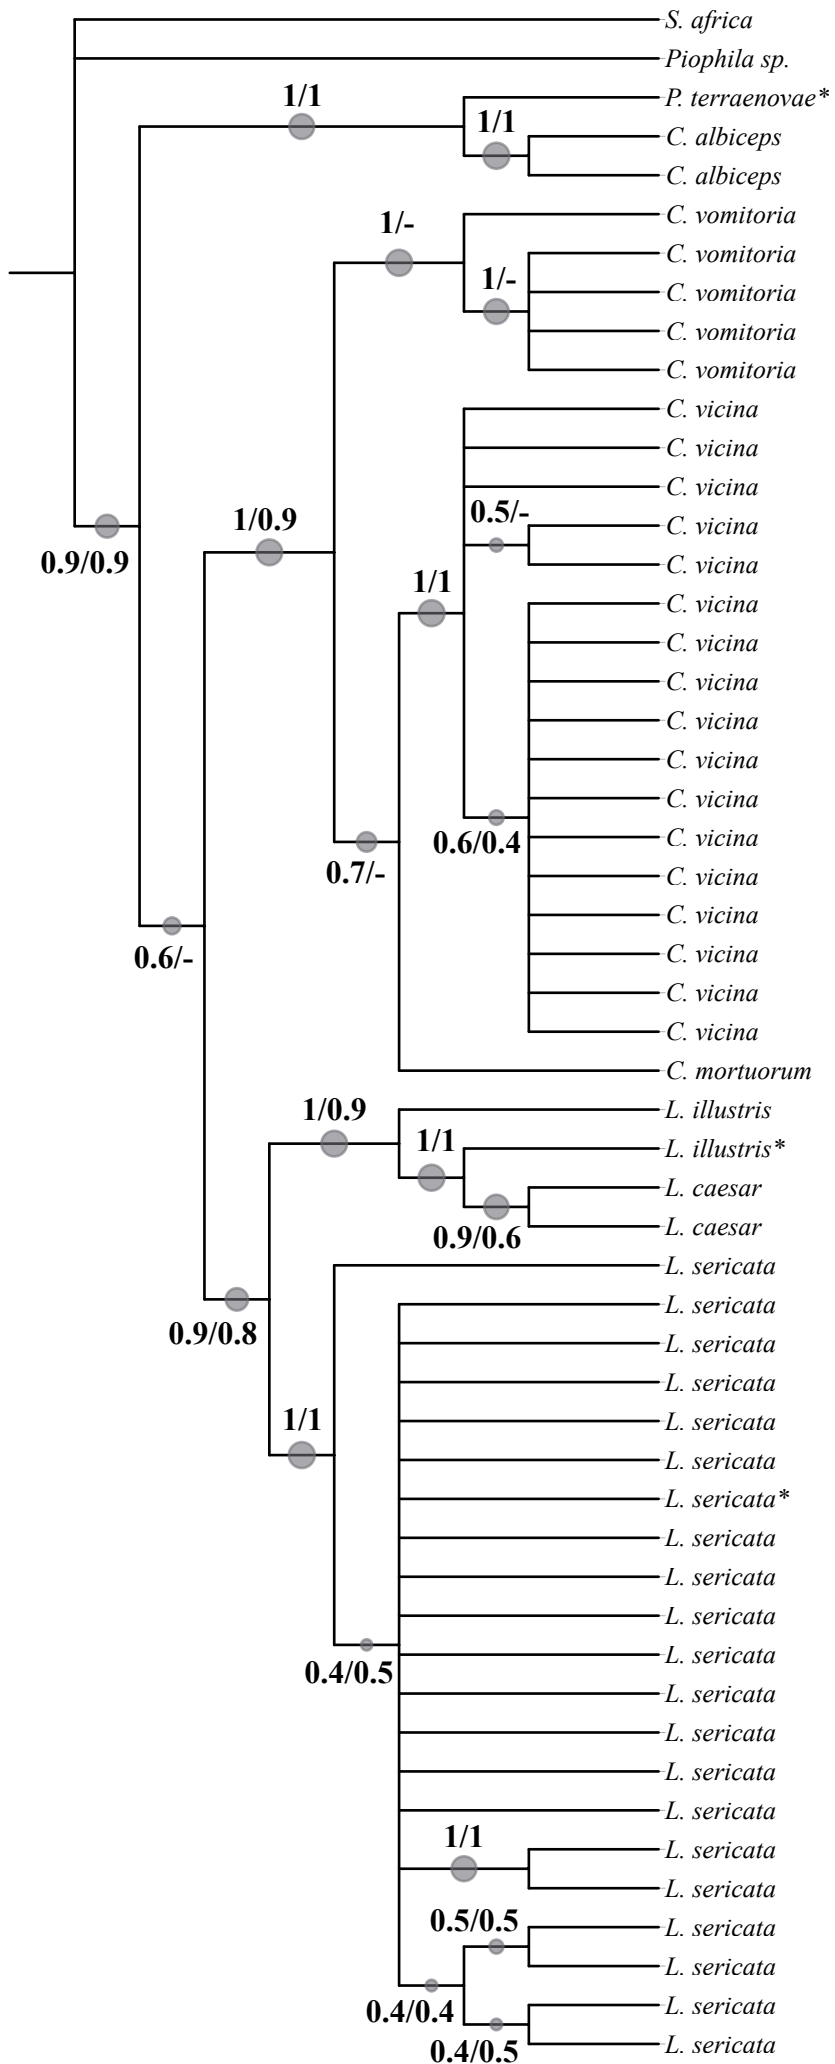

Supplement: Fig_S6.pdf [file Fig_S6.pdf]
